# Supplementary material for: Modulating crossover positioning by introducing large structural changes in chromosomes
Source: PubMed Central journal article supplement (PMC4359564; doi:10.1186/s12864-015-1276-z), 2015-02-15

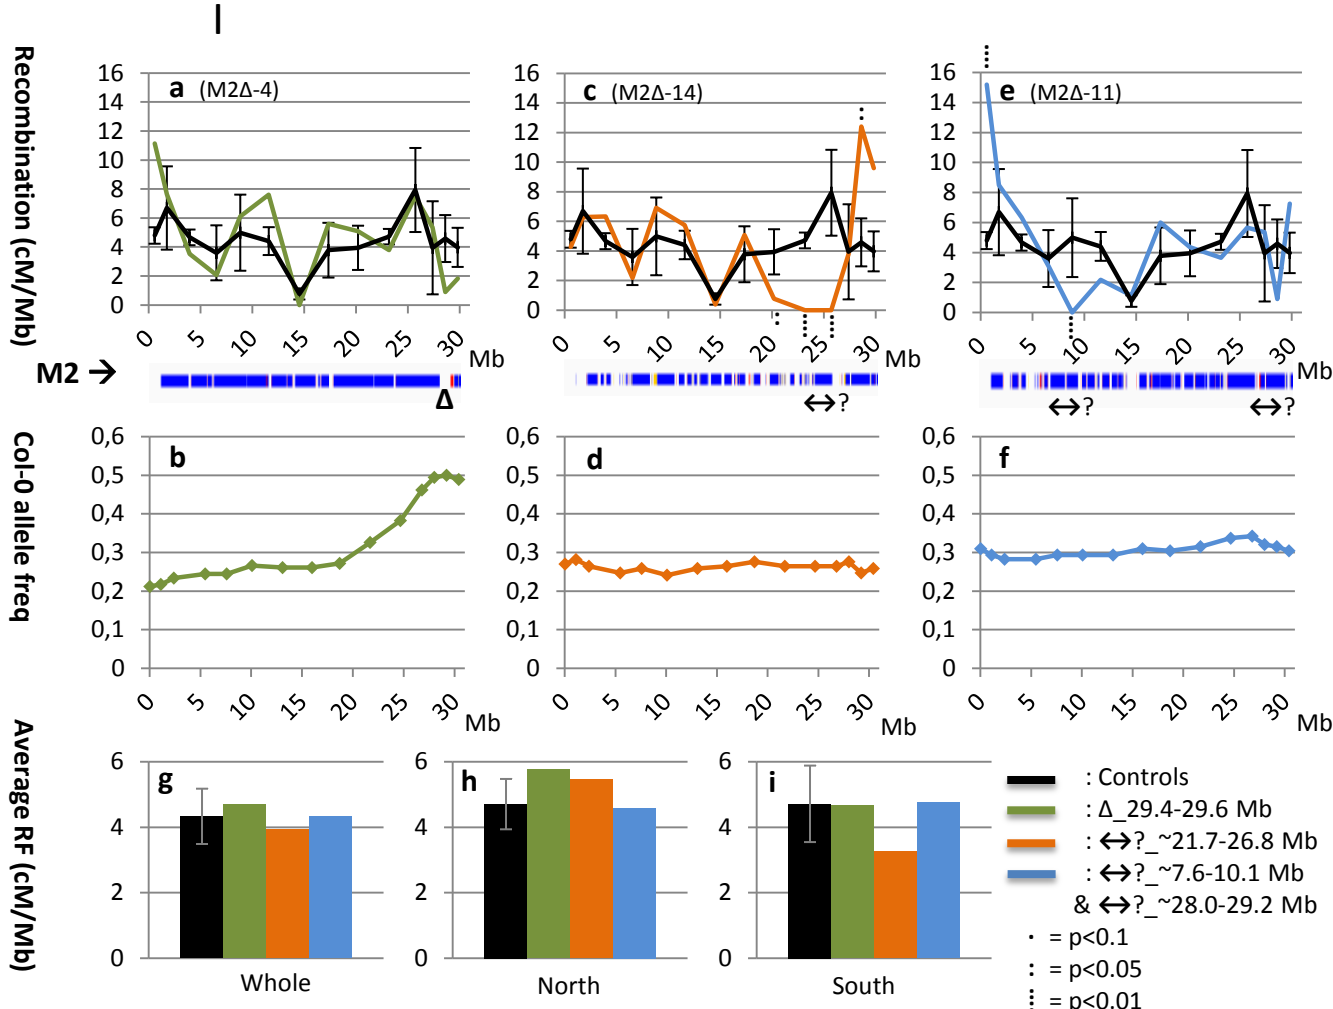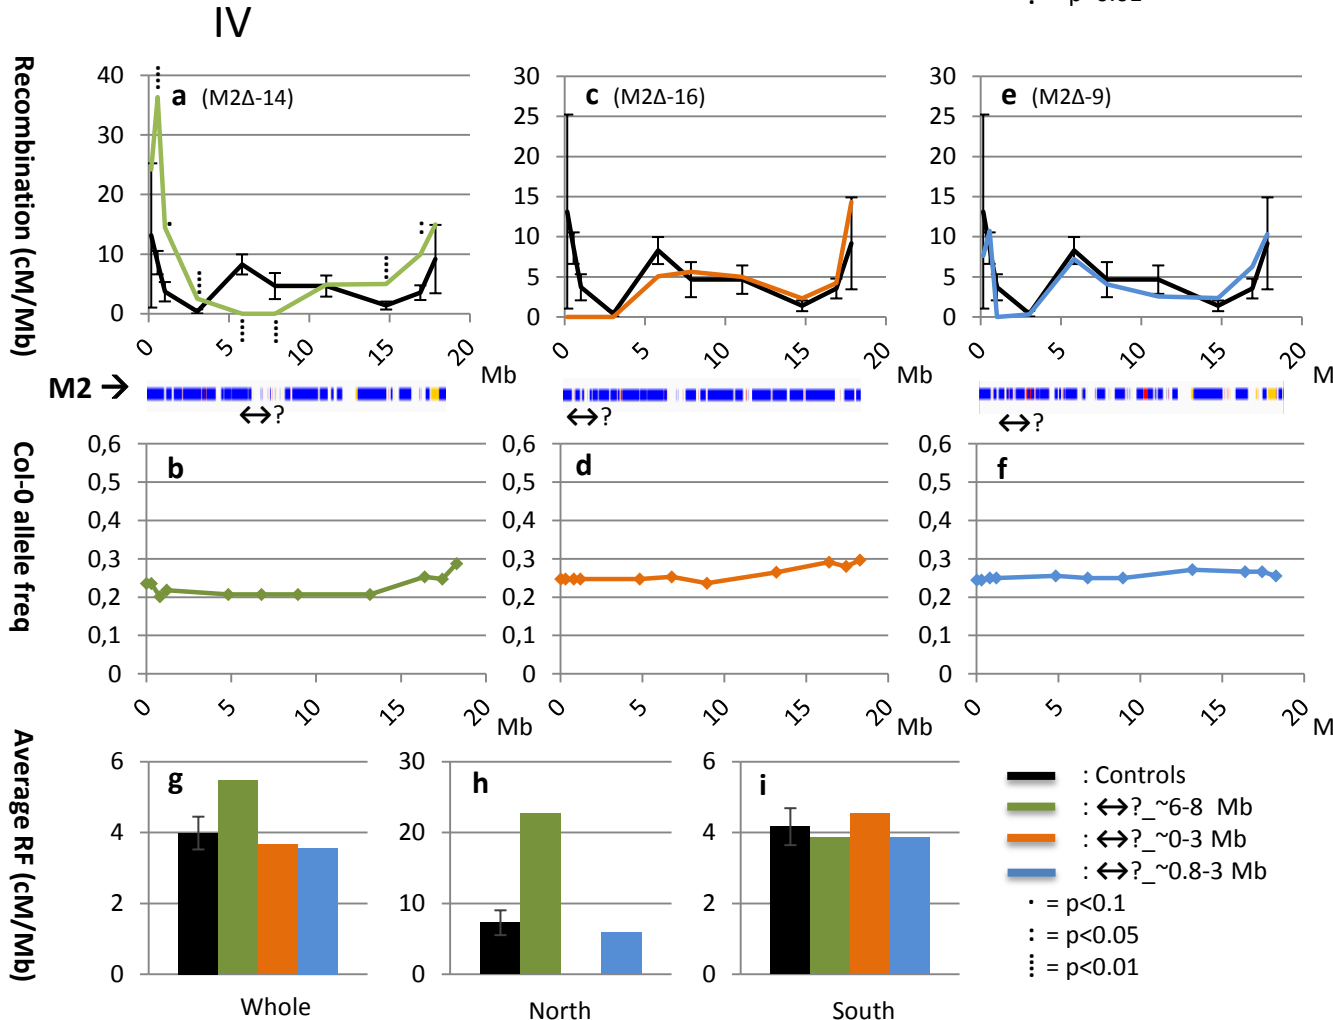

## V-A

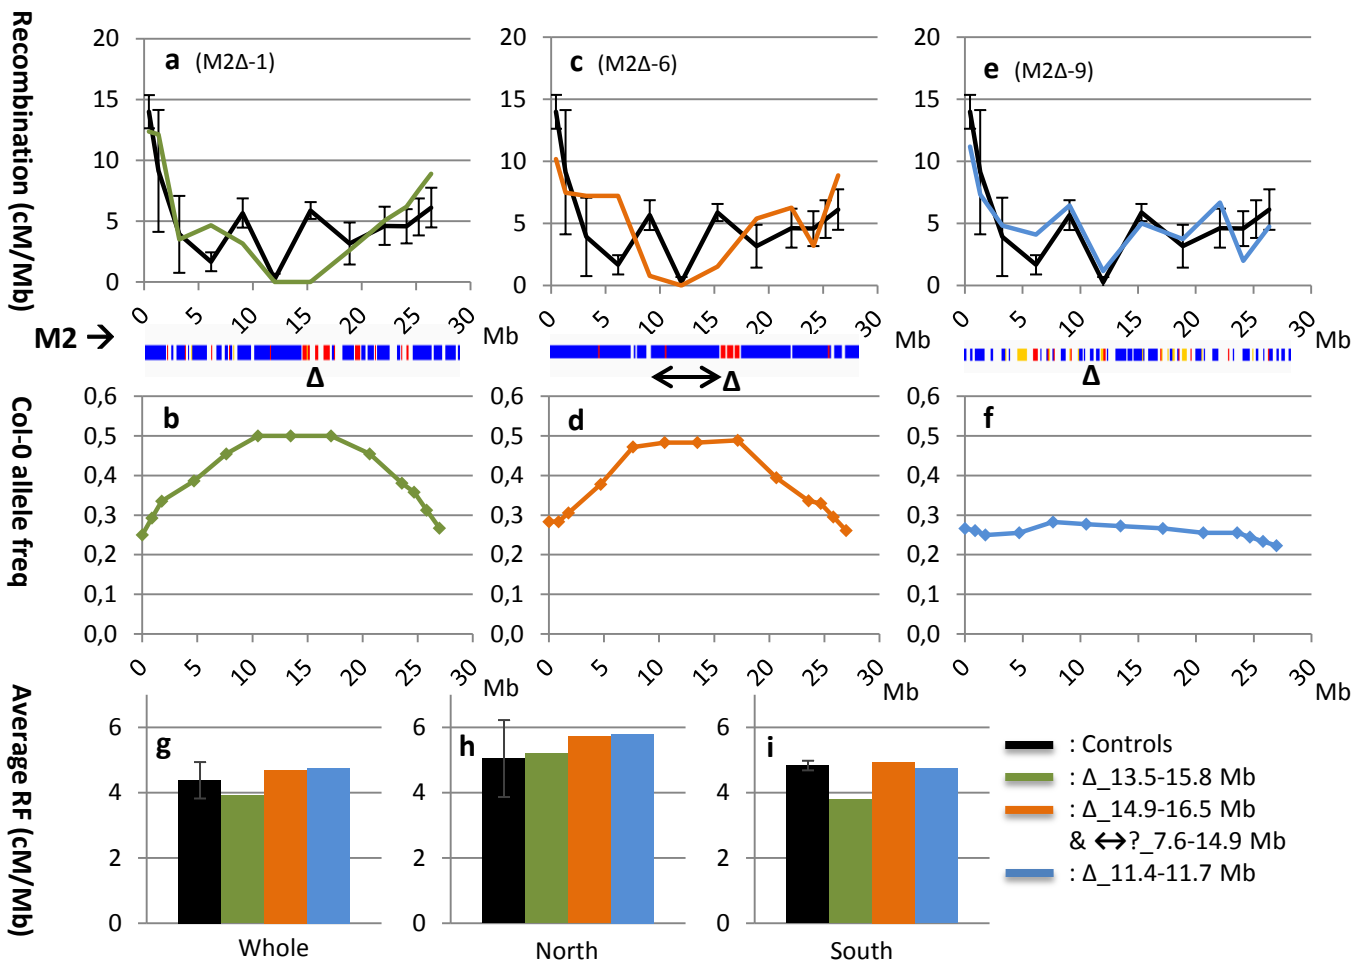

## V-B

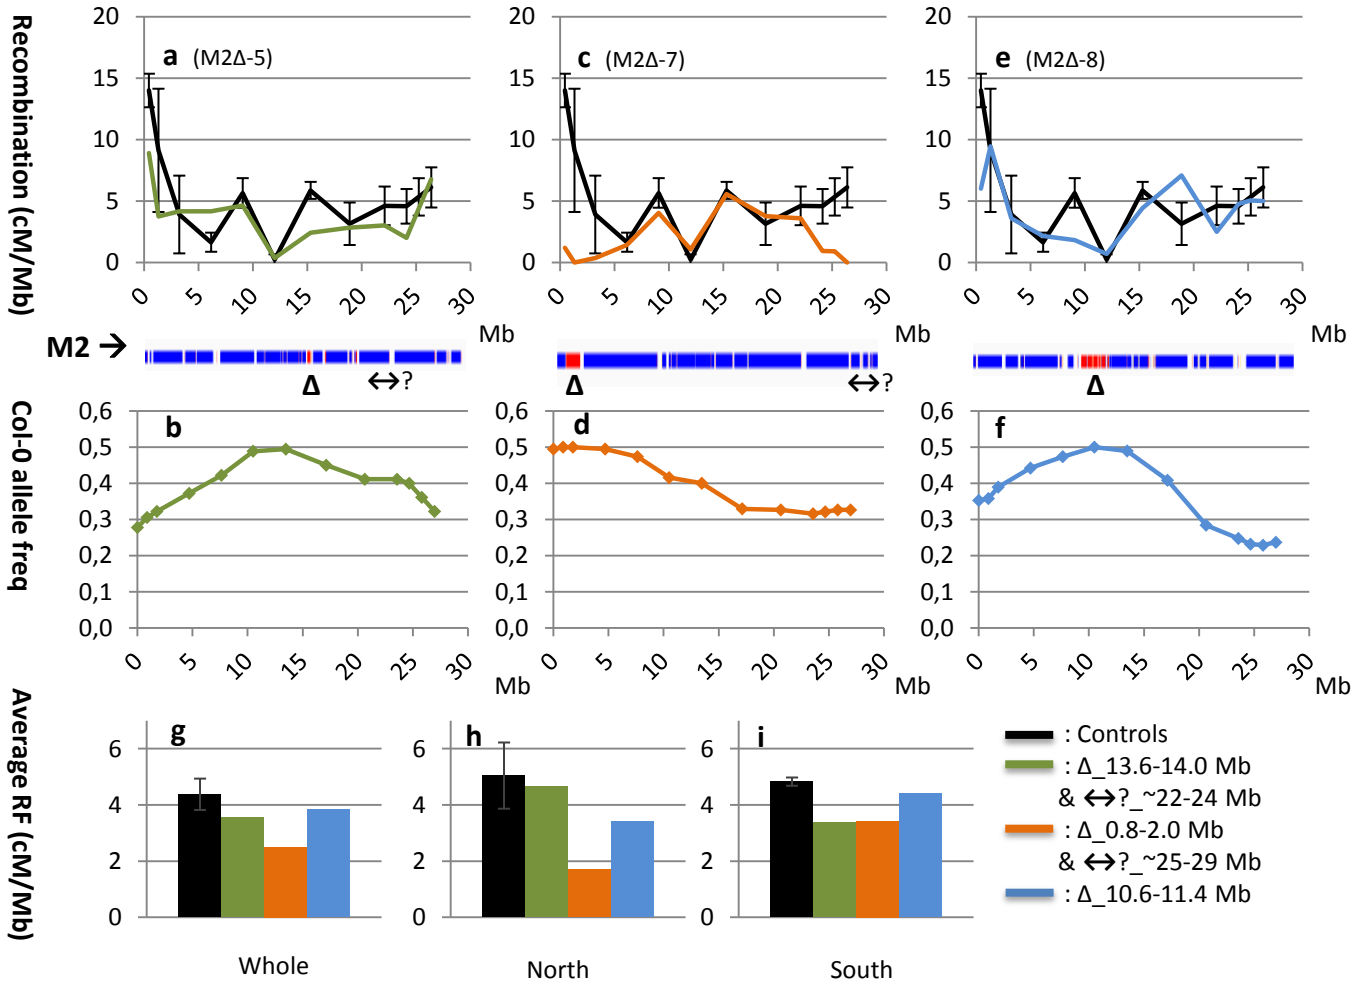

### III

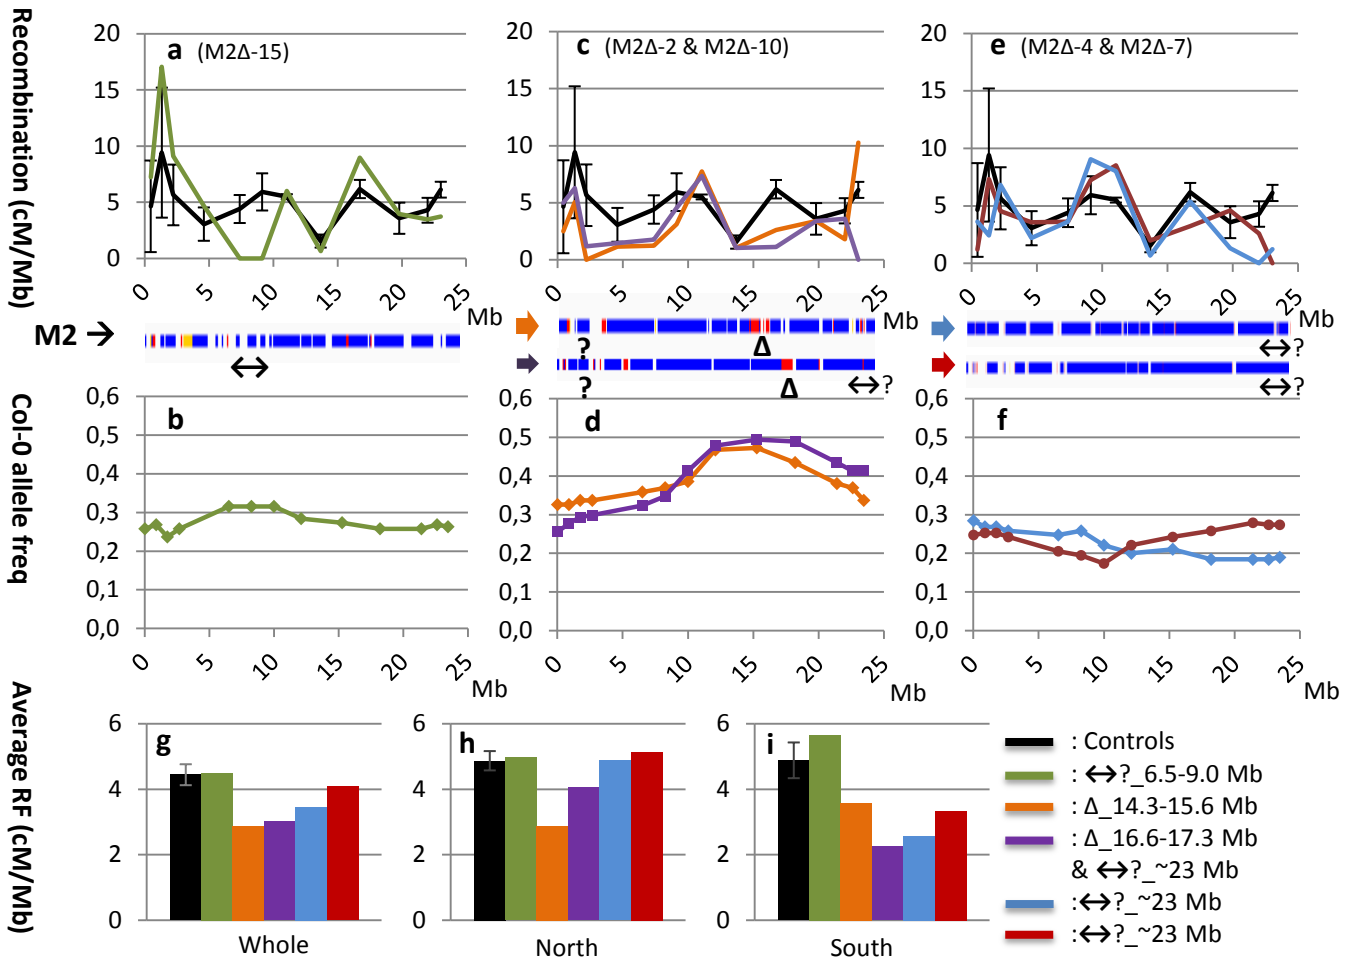

Supplement: 12864_2015_1276_MOESM2_ESM.pdf [file 12864_2015_1276_MOESM2_ESM.pdf]
